# Supplementary material for: In silico approach to designing rational metagenomic libraries for functional studies
Source: PubMed Central journal article supplement (PMC5441078; doi:10.1186/s12859-017-1668-y), 2017-05-22
Supplement: 12859_2017_1668_MOESM1_ESM.pdf [file 12859_2017_1668_MOESM1_ESM.pdf]

**Table S1: Distribution of HMM-based families that combined multiple HMMs**

| <b>Number of HMMs combined in family</b> | <b>Number of families</b> |
|------------------------------------------|---------------------------|
| 2                                        | 588                       |
| 3-5                                      | 229                       |
| 6-10                                     | 56                        |
| 11-20                                    | 16                        |
| >20                                      | 1                         |
